# Supplementary material
Source: PubMed Central journal article supplement (PMC2204039)
Supplement: NIHMS36241-supplement-supplement.pdf [file NIHMS36241-supplement-supplement.pdf]

**Supplemental Materials**

|         |         | Correlation C. |
|---------|---------|----------------|
| Maldi A | Maldi B | -0.267         |
|         | Maldi C | -0.168         |
|         | Maldi D | -0.126         |
|         | Maldi E | -0.031         |
|         | Maldi F | 0.131          |
| Maldi B | Maldi C | -0.117         |
|         | Maldi D | 0.040          |
|         | Maldi E | -0.082         |
|         | Maldi F | -0.288         |
| Maldi C | Maldi D | 0.392          |
|         | Maldi E | -0.132         |
|         | Maldi F | -0.137         |
| Maldi D | Maldi E | -0.188         |
|         | Maldi F | -0.259         |
| Maldi E | Maldi F | 0.198          |

**Supplemental Table 1.** Pearson's correlation coefficients for all marker combinations

(n=150).

| <b>Among controls</b> | <b>OR</b> | <b>CI</b> |      | <b>p</b> |
|-----------------------|-----------|-----------|------|----------|
| Maldi A               | 1.0       | 0.98      | 1.03 | 0.7085   |
| Maldi B               | 1.0       | 0.71      | 1.29 | 0.7687   |
| Maldi C               | 0.5       | 0.16      | 1.80 | 0.3111   |
| Maldi D               | 1.1       | 0.87      | 1.42 | 0.4080   |
| Maldi E               | 1.0       | 0.51      | 1.91 | 0.9745   |
| Maldi F               | 1.0       | 0.76      | 1.36 | 0.9293   |
| <b>Among cases</b>    | <b>OR</b> | <b>CI</b> |      | <b>p</b> |
| Maldi A               | 1.1       | 0.85      | 1.31 | 0.6221   |
| Maldi B               | 1.0       | 0.94      | 1.01 | 0.1228   |
| Maldi C               | 1.5       | 0.82      | 2.82 | 0.1838   |
| Maldi D               | 0.9       | 0.85      | 1.05 | 0.2973   |
| Maldi E               | 0.4       | 0.14      | 1.23 | 0.1125   |
| Maldi F               | 0.9       | 0.60      | 1.48 | 0.7935   |

**Supplemental Table 2.** Association of marker candidates with HCV RNA status.

Univariate logistic regression controlled for age and gender conducted separately among controls (N=72, 16 HCV RNA+, 56 HCV RNA-) and cases (N=78, 62 HCV RNA+, 16 HCV RNA-).

|         | <b>p-value</b> | <b>OR</b> | <b>95% CI</b> |      |
|---------|----------------|-----------|---------------|------|
| Maldi A | 0.003          | 0.6       | 0.47          | 0.85 |
| Maldi B | 0.003          | 1.5       | 1.14          | 1.85 |
| Maldi C | 0.010          | 3.5       | 1.34          | 8.87 |
| Maldi D | 0.007          | 1.4       | 1.09          | 1.70 |
| Maldi E | 0.113          | 0.5       | 0.19          | 1.20 |
| Maldi F | 0.001          | 0.2       | 0.11          | 0.56 |

**Supplemental Table 3.** Association of MALDI biomarkers with HCC

HCC samples collected between January and April 2002 (21 cases; 72 controls); analysis controlled for HCV-RNA, anti-HBC, residency, age, and gender.

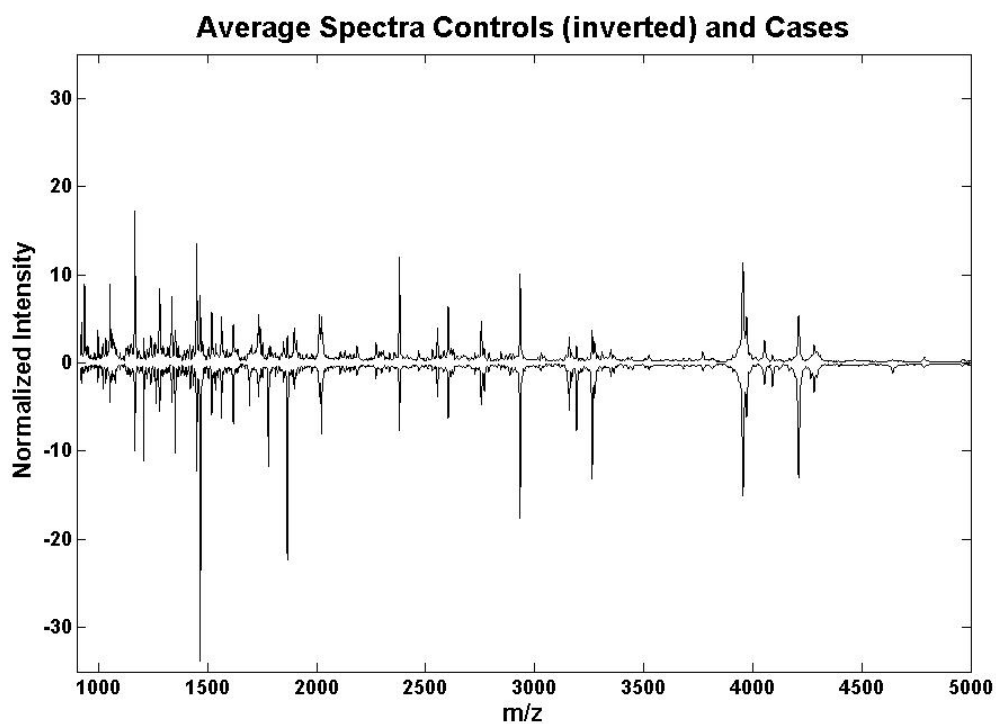

**Supplemental Figure 1.** Comparison of average spectra in HCC cases (n=78) and controls (n=72) in the full mass range from 900 to 5,000 Da. The average spectrum in controls is inverted to facilitate the comparison.

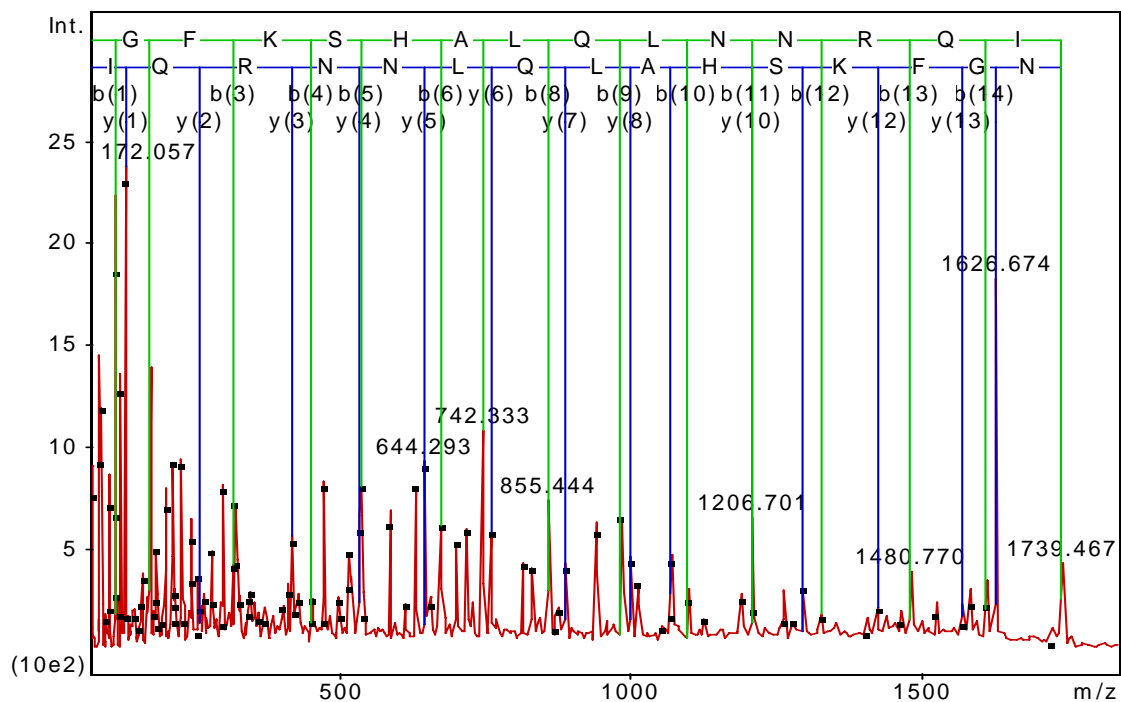

Supplemental Figure 2A.

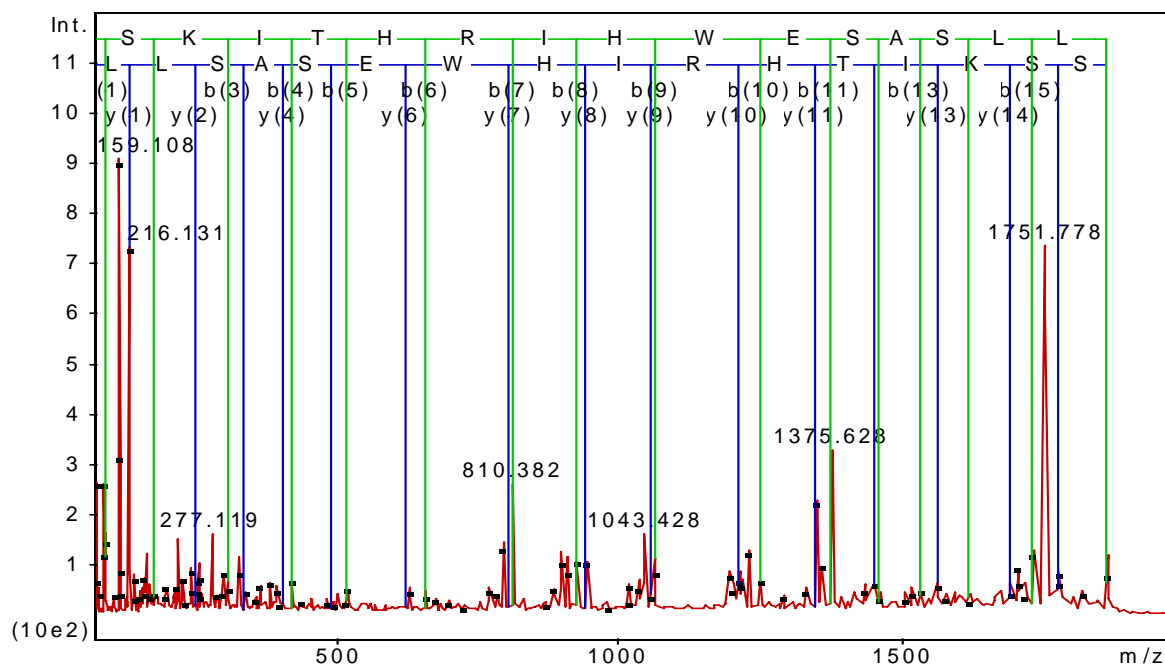

Supplemental Figure 2B.

1789

| #  | b         | Seq. | y         | y*        | #  |
|----|-----------|------|-----------|-----------|----|
| 1  | 115.0502  | N    |           |           | 15 |
| 2  | 172.0717  | G    | 1625.8870 | 1608.8605 | 14 |
| 3  | 319.1401  | F    | 1568.8656 | 1551.8390 | 13 |
| 4  | 447.2350  | K    | 1421.7972 | 1404.7706 | 12 |
| 5  | 534.2671  | S    | 1293.7022 | 1276.6757 | 11 |
| 6  | 671.3260  | H    | 1206.6702 | 1189.6436 | 10 |
| 7  | 742.3631  | A    | 1069.6113 | 1052.5847 | 9  |
| 8  | 855.4472  | L    | 998.5742  | 981.5476  | 8  |
| 9  | 983.5057  | Q    | 885.4901  | 868.4635  | 7  |
| 10 | 1096.5898 | L    | 757.4315  | 740.4050  | 6  |
| 11 | 1210.6327 | N    | 644.3474  | 627.3209  | 5  |
| 12 | 1324.6757 | N    | 530.3045  | 513.2780  | 4  |
| 13 | 1480.7768 | R    | 416.2616  | 399.2350  | 3  |
| 14 | 1608.8353 | Q    | 260.1605  | 243.1339  | 2  |
| 15 |           | I    | 132.1019  |           | 1  |
|    |           |      |           |           |    |

1864

| #  | b         | b <sup>0</sup> | Seq. | y         | #  |
|----|-----------|----------------|------|-----------|----|
| 1  | 88.0393   | 70.0287        | S    |           | 16 |
| 2  | 175.0713  | 157.0608       | S    | 1777.9708 | 15 |
| 3  | 303.1663  | 285.1557       | K    | 1690.9388 | 14 |
| 4  | 416.2504  | 398.2398       | I    | 1562.8438 | 13 |
| 5  | 517.2980  | 499.2875       | T    | 1449.7597 | 12 |
| 6  | 654.3569  | 636.3464       | H    | 1348.7120 | 11 |
| 7  | 810.4581  | 792.4475       | R    | 1211.6531 | 10 |
| 8  | 923.5421  | 905.5316       | I    | 1055.5520 | 9  |
| 9  | 1060.6010 | 1042.5905      | H    | 942.4680  | 8  |
| 10 | 1246.6804 | 1228.6698      | W    | 805.4090  | 7  |
| 11 | 1375.7229 | 1357.7124      | E    | 619.3297  | 6  |
| 12 | 1462.7550 | 1444.7444      | S    | 490.2871  | 5  |
| 13 | 1533.7921 | 1515.7815      | A    | 403.2551  | 4  |
| 14 | 1620.8241 | 1602.8135      | S    | 332.2180  | 3  |
| 15 | 1733.9082 | 1715.8976      | L    | 245.1860  | 2  |
| 16 |           |                | L    | 132.1019  | 1  |

### Supplemental Figure 2C.

**Supplemental Figure 2.** MS/MS spectra of two ions obtained by MALDI-TOF/TOF sequencing:

**A.** m/z 1739.842, NGFKSHALQLNNRQI, ions score 131, expect 5.9e-10. Found in CO4A\_HUMAN, Complement C4-A precursor;

**B.** m/z 1864.9993, SSKITHRIHWESASLL, ions score 99, expect 3.5e-6. Found in CO3\_Human, Complement C3 precursor

**C.** Tables of fragment ions for the 1739.84 and 1864.99 peptides matched by MASCOT

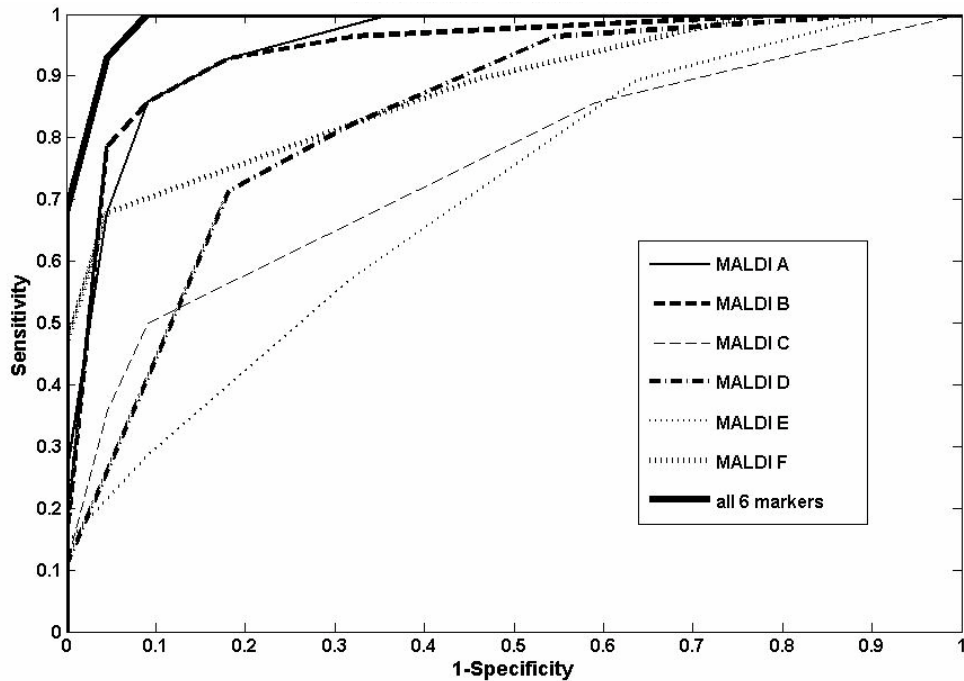

**Supplemental Figure 3.** ROC curve for six individual marker candidates and for a combined classifier consisting of all six markers. Each curve is based on 50 spectra from an independent test set of samples. Areas under the individual curves are listed in Table 5.
